# Supplementary material
Source: Springer Nature journal article supplement (https://www.springermedizin.de/resource/supplementary/13000_2011_463_MOESM1_ESM.pdf/9624620)

a.

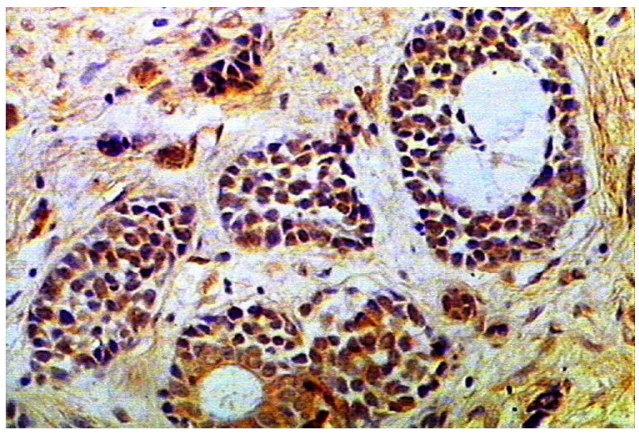

b.

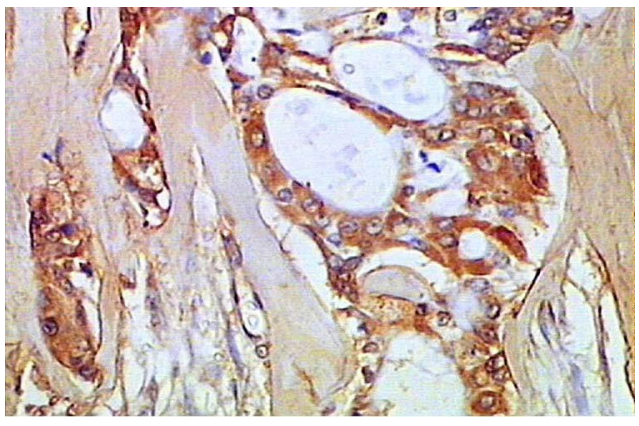

c.

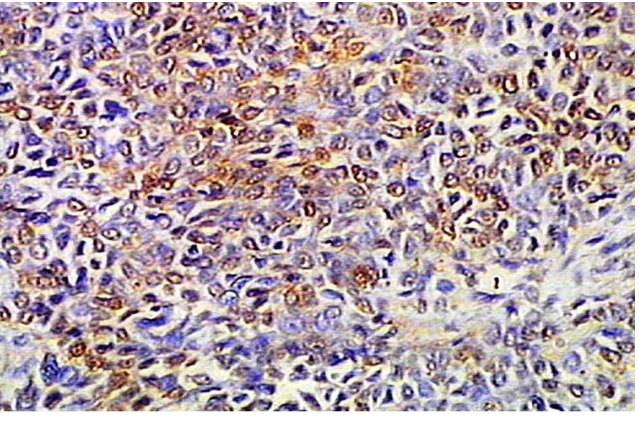

d.

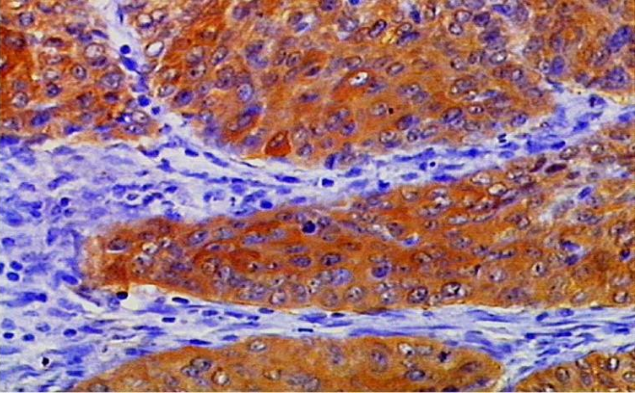

e.

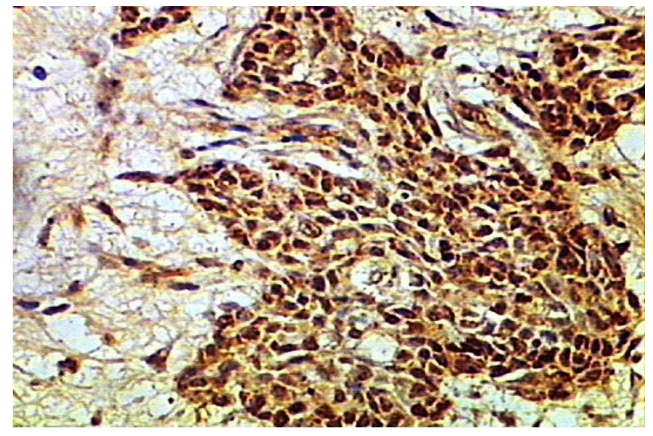

f.

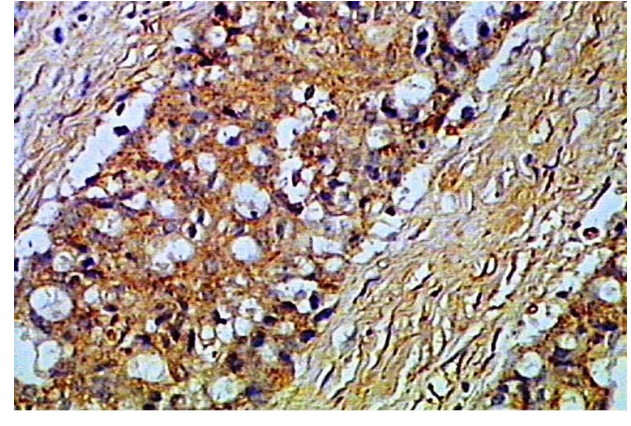

g.

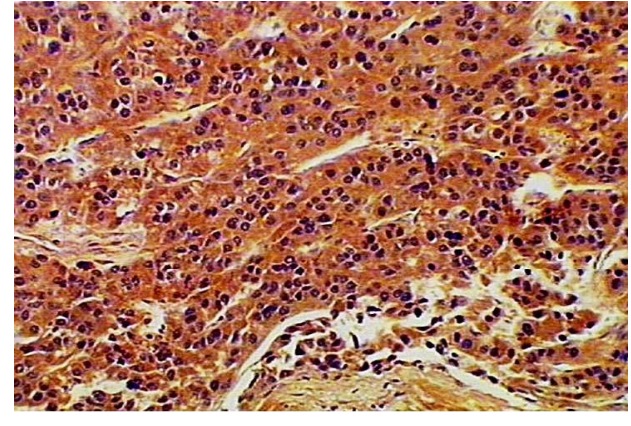

Supplement: MOESM1 [file 9624620]
